# Supplementary material for: Biphasic Temporal Relationship between Cancers and Systemic Sclerosis: A Clinical Series from Montpellier University Hospital and Review of the Literature
Source: MDPI journal article supplement (doi:10.3390/jcm9030853), 2020-03-20
Supplement: s1 [file s1]

## Supplemental tables

**Table 1b: Patients with systemic sclerosis and two cancers.**

| Patients   | Age at SSc onset (years) | SSc subset | Cancer 1                  | Delay between SSc diagnosis (T0) and cancer #1 onset (months) | Cancer 2                  | Delay between SSc diagnosis (T0) and cancer #2 onset (months) |
|------------|--------------------------|------------|---------------------------|---------------------------------------------------------------|---------------------------|---------------------------------------------------------------|
| Patient 1  | 68                       | lcSSc      | synchronous breast cancer | -252                                                          | synchronous breast cancer | 0                                                             |
| Patient 2  | 58                       | lcSSc      | breast                    | -240                                                          | pancreas                  | 108                                                           |
| Patient 3  | 60                       | lcSSc      | breast                    | -132                                                          | breast                    | 84                                                            |
| Patient 4  | 64                       | lcSSc      | breast                    | -6                                                            | myelodysplasia            | 38                                                            |
| Patient 5  | 45                       | lcSSc      | melanoma                  | -190                                                          | breast                    | -3                                                            |
| Patient 6  | 66                       | dcSSc      | colon                     | -27                                                           | lung                      | 21                                                            |
| Patient 7  | 69                       | dcSSc      | endometrium               | -201                                                          | breast                    | 40                                                            |
| Patient 8  | 62                       | lcSSc      | B-cell lymphoma           | 12                                                            | prostate                  | 48                                                            |
| Patient 9  | 73                       | lcSSc      | basal cell carcinoma      | 95                                                            | ampulloma                 | 111                                                           |
| Patient 10 | 47                       | dcSSc      | oesophagus                | 120                                                           | cholangiocarcinoma        | 120                                                           |
| Patient 11 | 51                       | dcSSc      | basal cell carcinoma      | 157                                                           | lung                      | 165                                                           |
| Patient 12 | 18                       | lcSSc      | synchronous lung cancer   | 312                                                           | synchronous lung cancer   | 0                                                             |

*lSSc, limited cutaneous systemic sclerosis; dSSc, diffuse cutaneous systemic sclerosis.*

**Table 2b: Immunosuppressive treatments received by SSc patients before cancer events.**

|                                                     | Breast cancers | Lung cancers | GI tract cancers | Skin cancers | Blood malignancies | Urinary tract cancers | ENT cancer | Total      |
|-----------------------------------------------------|----------------|--------------|------------------|--------------|--------------------|-----------------------|------------|------------|
| Number of patients with cancers diagnosed after SSc | 7              | 8            | 6                | 5            | 5                  | 4                     | 2          | 37         |
| Patients with IS treatment prior to cancer event    | 2 (28.6%)      | 3 (37.5%)    | 3 (50.0%)        | 2 (40.0%)    | 3 (60.0%)          | 4 (100.0%)            | 1 (50.0%)  | 18 (48.6%) |
| MTX                                                 | 2              | 2            | 3                | 2            | 2                  | 2                     | 0          | 13         |
| AZA                                                 | 1              | 3            | 1                | 1            | 1                  | 2                     | 0          | 9          |
| CYC                                                 | 0              | 2            | 1                | 1            | 2                  | 2                     | 1          | 9          |
| LEF                                                 | 0              | 0            | 0                | 1            | 0                  | 0                     | 0          | 1          |
| MMF                                                 | 0              | 0            | 0                | 0            | 1                  | 0                     | 1          | 2          |

*SSc, systemic sclerosis; GI: gastro intestinal; ENT, ear-nose-throat; MTX, methotrexate; AZA, azathioprine; CYC, cyclophosphamide; LEF, leflunomide; MMF, mycophenolate mofetil; IS, immunosuppressants.*
